# Supplementary material for: A highly efficient uranium grabber derived from acrylic fiber for extracting uranium from seawater
Source: Royal Society of Chemistry journal article supplement (doi:10.1039/c9dt04562g), 2020-01-01
Supplement: c9dt04562g1.pdf [file c9dt04562g1.pdf]

## Supplementary Information

### **A highly efficient uranium grabber derived from acrylic fiber for extracting uranium from seawater**

Horng-Bin Pan<sup>a,b</sup>, Chien M. Wai<sup>\*a,b</sup>, Li-Jung Kuo<sup>c</sup>, Gary A. Gill<sup>c</sup>, Joanna S. Wang<sup>a,b</sup>,  
Ruma Joshi<sup>a</sup>, Christopher J. Janke<sup>d</sup>

<sup>a</sup>Department of Chemistry, University of Idaho, Moscow, ID 83844

<sup>b</sup>LCW Supercritical Technologies, Moscow, ID 83843

<sup>c</sup>Marine Sciences Laboratory, Pacific Northwest National Laboratory, Sequim, WA  
98382

<sup>d</sup>Chemical Sciences Division, Oak Ridge National Lab, Oak Ridge, TN 37831

### **Estimate the amidoxime/carboxylate ratio and nitrile peak intensity in the fiber adsorbent**

We estimate the ratio amidoxime/COO<sup>-</sup> and -CN base on the decrease in the -CN peak intensity shown in Fig 1S. The decrease of the -CN peak is 50% after the amidoximation reaction (1st step). About 46% amidoxime was produced because the acrylic fiber contains 92% acrylonitrile and 8% methyl acrylate monomers. The decrease of the -CN peak intensity is another 40% after the alkaline hydrolysis reaction (2nd step) with about 10% of -CN remaining in the fiber. The actual percent of -CN in the fiber is 9% because the fiber is made of 92% acrylonitrile and 8% methyl acrylate. In the 2<sup>nd</sup> step, about 37% of carboxylate was produced from the -CN group. Moreover, both ester and hydroxamic acid groups are converted to carboxylate (8%) during the alkaline hydrolysis reaction (2nd step).<sup>1, 2</sup> The final distribution of the

chemical groups in the fiber adsorbent is estimated to be 46% amidoxime, 45% carboxylate, and 9% nitrile.

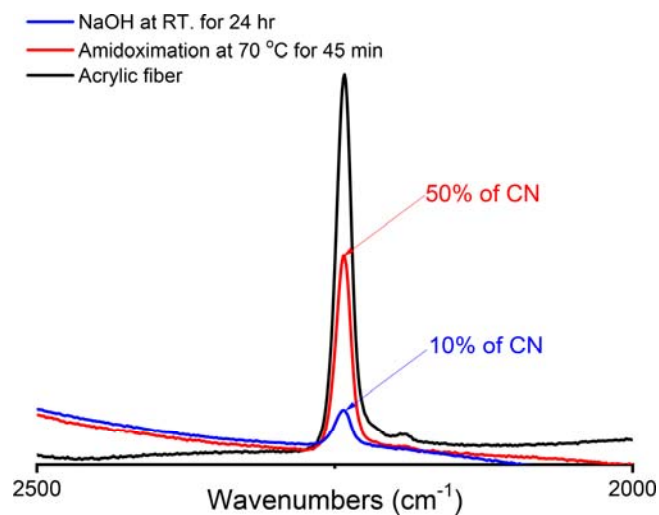

Fig. 1S The nitrile ( $\text{—C}\equiv\text{N}$ ) peak in FTIR spectra of the original acrylic fiber (black), after amidoximation (step 1, red), and after NaOH treatment (step 2, blue). (The spectra were normalized to the  $\text{—CH}_2\text{—}$  in-plane bending or scissoring band ( $\delta_s\text{CH}_2$ ) at  $1450\text{ cm}^{-1}$ )

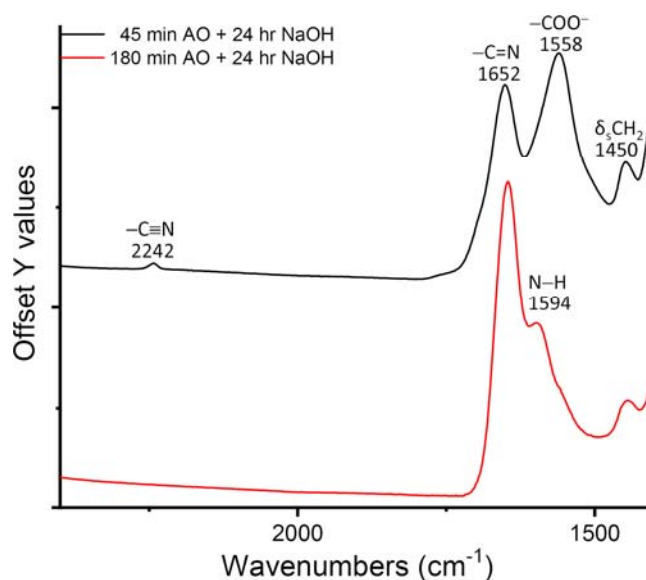

Fig. 2S FTIR spectra of different amidoximation time (black, 45 min; red, 180 min) of polymer fiber adsorbents. (The spectra were normalized to the  $\text{—CH}_2\text{—}$  in-plane bending or scissoring band ( $\delta_s\text{CH}_2$ ) at  $1450\text{ cm}^{-1}$ )

## References

1. M. Smith, *March's advanced organic chemistry : reactions, mechanisms, and structure*, Wiley, Hoboken, New Jersey, 2013.
2. K. K. Ghosh, S. K. Patle and S. S. Thakur, *Chem. Eng. Commun.*, 2006, **193**, 363-369.
